# Supplementary material for: Theoretical study on thiophene-based double helicenes with intrinsic large second-order nonlinear optical response
Source: Royal Society of Chemistry journal article supplement (doi:10.1039/c6ra18421a), 2016-01-01
Supplement: c6ra18421a1.pdf [file c6ra18421a1.pdf]

## **Theoretical study on thiophene-based double helicenes with intrinsic large second-order nonlinear optical response**

Yanling Si,<sup>a</sup> Xinyu Zhao<sup>a</sup> Ziyi Su<sup>c,\*</sup> and Guochun Yang<sup>b,\*</sup>

a. College of Resource and Environmental Science, Jilin Agricultural University, Changchun 130118, China

b. Centre for Advanced Optoelectronic Functional Materials Research and Key Laboratory for UV Light-Emitting Materials and Technology of Ministry of Education, Northeast Normal University, Changchun 130024, China

c. School of Computer Science & Information Technology, Northeast Normal University, Changchun, 130117 China.

**Table S1.** The main concerned bond length for compound **b-1** between experiment and calculation

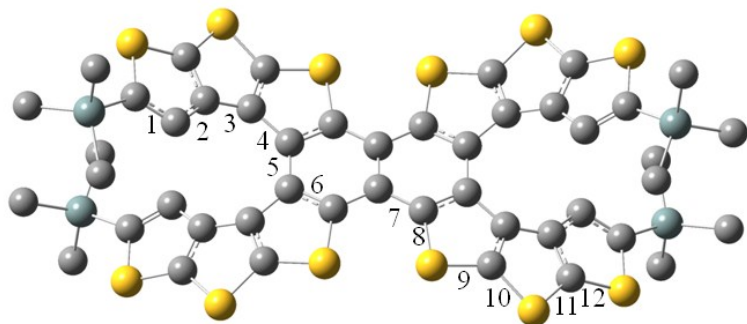

| Bond | B3LYP | Experiment | Difference |
|------|-------|------------|------------|
| 1    | 1.374 | 1.382      | -0.008     |
| 2    | 1.434 | 1.410      | 0.024      |
| 3    | 1.452 | 1.460      | -0.008     |
| 4    | 1.447 | 1.457      | -0.010     |
| 5    | 1.427 | 1.458      | -0.031     |
| 6    | 1.407 | 1.408      | -0.001     |
| 7    | 1.431 | 1.445      | -0.014     |
| 8    | 1.778 | 1.766      | 0.012      |
| 9    | 1.735 | 1.716      | 0.019      |
| 10   | 1.750 | 1.752      | -0.002     |
| 11   | 1.751 | 1.743      | 0.008      |
| 12   | 1.731 | 1.744      | -0.013     |

Note: the difference is equal to calculation value minus experimental value.

**Table S2.** The calculated excitation energies, oscillator strengths and rotational strengths for compound **a-1** in the gas phase at the TD-B3LYP/ 6-31+G(d) level

| states | eV     | $\lambda^a$ | $f^b$  | R(length) <sup>c</sup> | R(velocity) <sup>c</sup> |
|--------|--------|-------------|--------|------------------------|--------------------------|
| 1      | 3.0863 | 401.73      | 0.0047 | -4.5446                | -4.5063                  |
| 2      | 3.1724 | 390.83      | 0.1079 | 49.7461                | 47.0734                  |
| 3      | 3.4568 | 358.67      | 1.0445 | -322.1801              | -314.3870                |
| 4      | 3.5759 | 346.72      | 0.1039 | 63.2617                | 62.2392                  |
| 5      | 3.6321 | 341.36      | 0.0000 | 0.0012                 | 0.0012                   |
| 6      | 3.6902 | 335.98      | 0.0019 | -7.3021                | -7.5226                  |
| 7      | 3.7187 | 333.41      | 0.3889 | -48.7064               | -46.6584                 |
| 8      | 3.8061 | 325.75      | 0.0001 | 1.8660                 | 2.1389                   |
| 9      | 3.8172 | 324.81      | 0.0007 | -1.9063                | -2.2540                  |
| 10     | 3.8591 | 321.28      | 0.0024 | 22.7132                | 22.4641                  |
| 11     | 3.8808 | 319.48      | 0.0094 | 6.8409                 | 6.2753                   |
| 12     | 3.8843 | 319.19      | 0.0492 | 119.7133               | 116.7099                 |
| 13     | 3.9053 | 317.48      | 0.0007 | 0.3541                 | 0.3258                   |
| 14     | 3.9053 | 317.47      | 0.0152 | 7.2338                 | 6.6363                   |
| 15     | 3.9386 | 314.79      | 0.0053 | 24.0212                | 30.4695                  |
| 16     | 3.9912 | 310.64      | 0.0000 | -0.0005                | -0.0005                  |
| 17     | 4.0141 | 308.87      | 0.0035 | -13.2801               | -12.5949                 |
| 18     | 4.0151 | 308.80      | 0.0000 | 0.0004                 | 0.0004                   |
| 19     | 4.0349 | 307.28      | 0.0281 | -31.0832               | -29.3246                 |
| 20     | 4.0600 | 305.38      | 0.0104 | -21.4989               | -20.1204                 |
| 21     | 4.0686 | 304.73      | 0.0000 | 0.0036                 | 0.0035                   |
| 22     | 4.0829 | 303.67      | 0.0000 | 0.0041                 | 0.0038                   |
| 23     | 4.1241 | 300.64      | 0.1580 | 4.3039                 | 4.3471                   |
| 24     | 4.1461 | 299.04      | 0.0017 | -0.2112                | -0.2390                  |
| 25     | 4.1823 | 296.45      | 0.0042 | 29.2515                | 25.3589                  |
| 26     | 4.2714 | 290.27      | 0.0206 | -87.9517               | -77.9490                 |
| 27     | 4.2844 | 289.38      | 0.0725 | -12.0661               | -11.7603                 |
| 28     | 4.3174 | 287.17      | 0.0000 | -0.0055                | -0.0057                  |
| 29     | 4.3730 | 283.52      | 0.0000 | 0.0028                 | 0.0054                   |
| 30     | 4.3744 | 283.43      | 0.0128 | 8.5173                 | 8.3874                   |
| 31     | 4.3871 | 282.61      | 0.0150 | 25.5597                | 24.7837                  |
| 32     | 4.4237 | 280.28      | 0.0000 | -0.0023                | -0.0022                  |
| 33     | 4.4476 | 278.77      | 0.0057 | 2.9771                 | 2.7757                   |
| 34     | 4.4517 | 278.51      | 0.0109 | 1.0915                 | 1.0903                   |
| 35     | 4.4630 | 277.81      | 0.0000 | 0.0031                 | 0.0038                   |
| 36     | 4.4754 | 277.04      | 0.0349 | -29.6402               | -28.2410                 |
| 37     | 4.4797 | 276.77      | 0.0220 | 3.2031                 | 2.9920                   |
| 38     | 4.5070 | 275.10      | 0.0008 | -6.2383                | -7.2354                  |
| 39     | 4.5135 | 274.70      | 0.0186 | 5.3431                 | 4.9553                   |
| 40     | 4.5164 | 274.52      | 0.0089 | -68.2526               | -63.7132                 |
| 41     | 4.5245 | 274.03      | 0.0157 | -2.0731                | -2.0363                  |
| 42     | 4.5292 | 273.75      | 0.0000 | 0.2807                 | 0.2814                   |
| 43     | 4.5479 | 272.62      | 0.0343 | 166.7376               | 168.9089                 |
| 44     | 4.5548 | 272.21      | 0.0183 | 35.2211                | 33.8545                  |

|    |        |        |        |           |           |
|----|--------|--------|--------|-----------|-----------|
| 45 | 4.5683 | 271.40 | 0.0000 | -0.0411   | -0.0857   |
| 46 | 4.5730 | 271.12 | 0.0246 | -34.9630  | -34.4344  |
| 47 | 4.5749 | 271.01 | 0.0012 | 18.8557   | 9.9096    |
| 48 | 4.5791 | 270.76 | 0.0384 | 64.9271   | 61.6046   |
| 49 | 4.5880 | 270.24 | 0.1125 | -19.4526  | -18.6733  |
| 50 | 4.5943 | 269.86 | 0.0011 | -10.3381  | -10.1221  |
| 51 | 4.6235 | 268.16 | 0.0028 | -6.5605   | -5.7661   |
| 52 | 4.6303 | 267.76 | 0.0166 | 10.5961   | 9.8594    |
| 53 | 4.6419 | 267.10 | 0.0000 | 0.0176    | 0.0083    |
| 54 | 4.6468 | 266.82 | 0.0860 | 45.5050   | 42.8182   |
| 55 | 4.6641 | 265.83 | 0.0001 | 2.6438    | 1.8085    |
| 56 | 4.6814 | 264.85 | 0.0205 | -3.8350   | -3.7928   |
| 57 | 4.6843 | 264.68 | 0.0000 | 0.0333    | 0.0307    |
| 58 | 4.6964 | 264.00 | 0.0004 | -1.2473   | -0.3353   |
| 59 | 4.7037 | 263.59 | 0.0331 | -24.8137  | -23.4488  |
| 60 | 4.7221 | 262.56 | 0.0000 | 0.2666    | 0.2562    |
| 61 | 4.7236 | 262.48 | 0.0001 | 0.9731    | 1.6789    |
| 62 | 4.7369 | 261.74 | 0.0105 | 38.0727   | 39.3940   |
| 63 | 4.7459 | 261.25 | 0.0188 | -30.0529  | -29.5524  |
| 64 | 4.7459 | 261.24 | 0.0002 | 12.6294   | 10.7195   |
| 65 | 4.7522 | 260.90 | 0.0210 | -12.5870  | -12.1597  |
| 66 | 4.7628 | 260.32 | 0.0052 | -9.9692   | -10.2952  |
| 67 | 4.7708 | 259.88 | 0.0069 | 11.0418   | 11.3024   |
| 68 | 4.7765 | 259.57 | 0.0011 | 13.7665   | 13.7623   |
| 69 | 4.7828 | 259.23 | 0.0000 | 0.0158    | 0.0153    |
| 70 | 4.7876 | 258.97 | 0.0001 | 0.0485    | 0.0488    |
| 71 | 4.8110 | 257.71 | 0.0693 | 334.0640  | 326.8443  |
| 72 | 4.8168 | 257.40 | 0.0004 | 1.6186    | 1.5561    |
| 73 | 4.8345 | 256.46 | 0.0014 | 0.8597    | 0.7911    |
| 74 | 4.8409 | 256.12 | 0.0001 | 0.5680    | 0.5572    |
| 75 | 4.8444 | 255.93 | 0.0618 | -79.3180  | -75.2677  |
| 76 | 4.8597 | 255.13 | 0.0522 | 20.8158   | 19.8597   |
| 77 | 4.8704 | 254.57 | 0.1487 | -42.3446  | -41.1880  |
| 78 | 4.8745 | 254.35 | 0.0226 | -4.3350   | -4.0199   |
| 79 | 4.8770 | 254.22 | 0.0000 | 1.2840    | 3.9233    |
| 80 | 4.8790 | 254.12 | 0.0000 | 0.2608    | 0.2953    |
| 81 | 4.9075 | 252.64 | 0.0597 | 39.9947   | 39.9140   |
| 82 | 4.9274 | 251.62 | 0.0002 | -0.5432   | -0.2972   |
| 83 | 4.9460 | 250.68 | 0.0023 | 9.5728    | 9.7417    |
| 84 | 4.9482 | 250.57 | 0.0123 | 58.4294   | 57.7177   |
| 85 | 4.9531 | 250.32 | 0.0002 | -2.6118   | -6.2603   |
| 86 | 4.9578 | 250.08 | 0.0000 | -0.0031   | -0.0067   |
| 87 | 4.9646 | 249.74 | 0.0319 | -10.6980  | -10.6344  |
| 88 | 4.9747 | 249.23 | 0.1753 | -114.8786 | -110.3011 |
| 89 | 4.9762 | 249.15 | 0.0067 | 56.8430   | 59.4860   |
| 90 | 4.9866 | 248.64 | 0.0002 | 1.1220    | 1.1084    |
| 91 | 4.9875 | 248.59 | 0.0073 | -17.0624  | -15.7708  |
| 92 | 4.9952 | 248.21 | 0.0005 | 0.5346    | 0.3795    |
| 93 | 4.9961 | 248.16 | 0.0001 | 0.4844    | 0.4645    |
| 94 | 5.0064 | 247.65 | 0.0567 | -64.8294  | -63.0271  |

|     |        |        |        |          |          |
|-----|--------|--------|--------|----------|----------|
| 95  | 5.0160 | 247.18 | 0.0129 | 41.7535  | 44.2869  |
| 96  | 5.0185 | 247.05 | 0.0765 | -15.7408 | -15.5485 |
| 97  | 5.0205 | 246.96 | 0.0555 | -9.0779  | -8.9051  |
| 98  | 5.0256 | 246.70 | 0.0105 | 37.2981  | 35.8299  |
| 99  | 5.0374 | 246.13 | 0.0000 | 0.0325   | 0.0367   |
| 100 | 5.0525 | 245.39 | 0.0000 | 0.1091   | 0.1049   |

<sup>a</sup> $\lambda$  in nm. <sup>b</sup>Oscillator Strengths. <sup>c</sup>R values (in  $10^{-40}$  esu<sup>2</sup>cm<sup>2</sup>) using the velocity-gauge representation and length-gauge representation of the electric dipole operator.

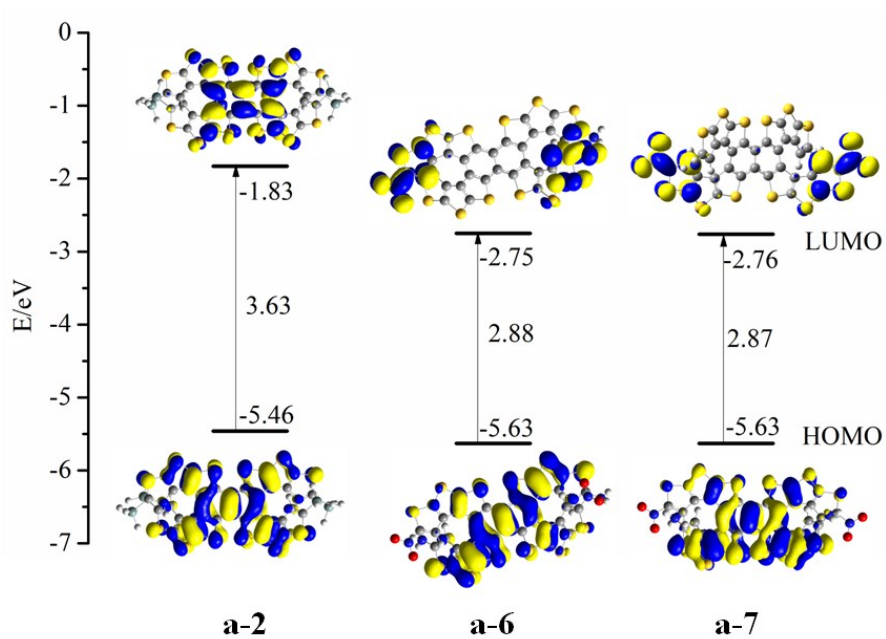

**Fig. S1** HOMO and LUMO surfaces and energy gaps for **a-2**, **a-6** and **a-7**.

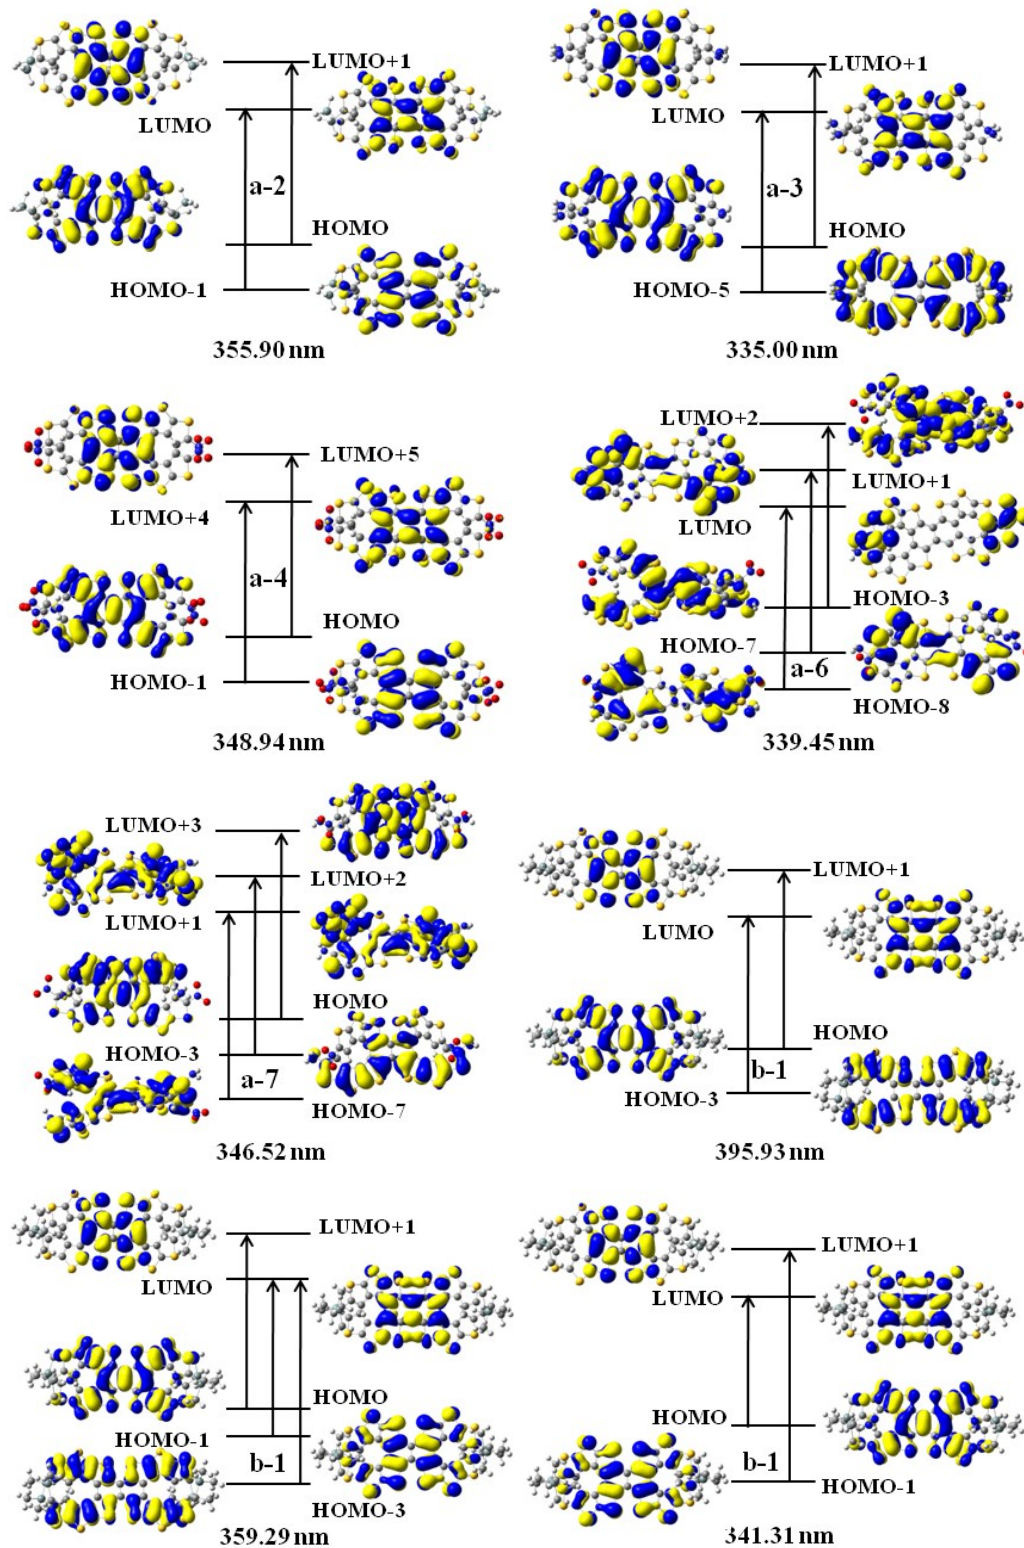

**Fig. S2** Molecular orbital isosurfaces involved in the main electron transitions of compounds **a-(2-4)**, **a-(6-7)** and **b-1** at the TDB3LYP/6-31+G(d) level of theory.

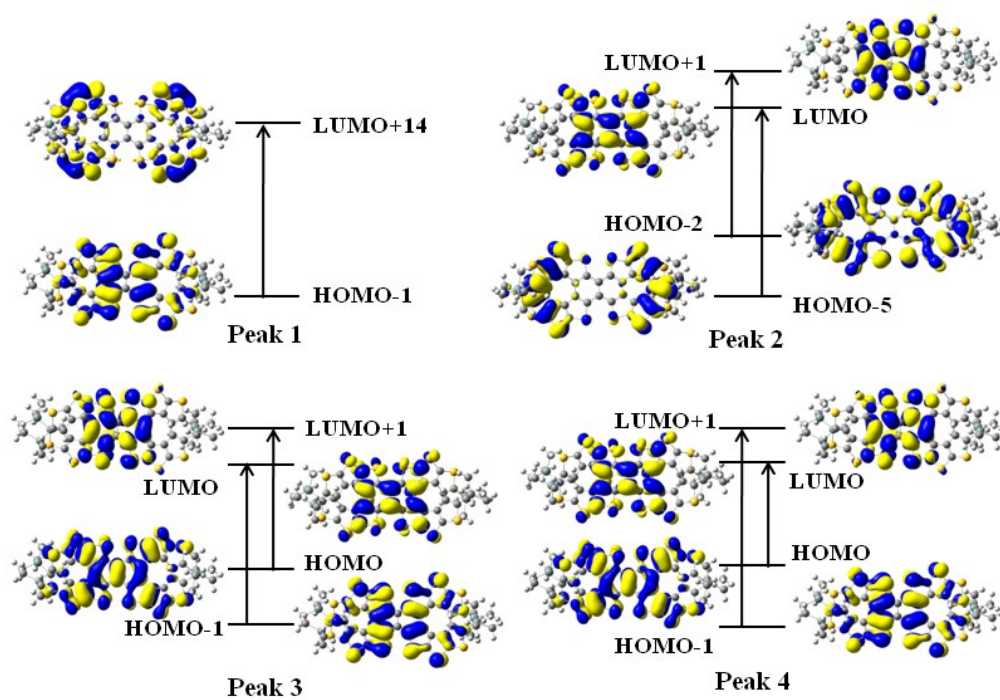

**Fig. S3** Molecular orbitals involved into the main ECD transitions of compound **a-1**.

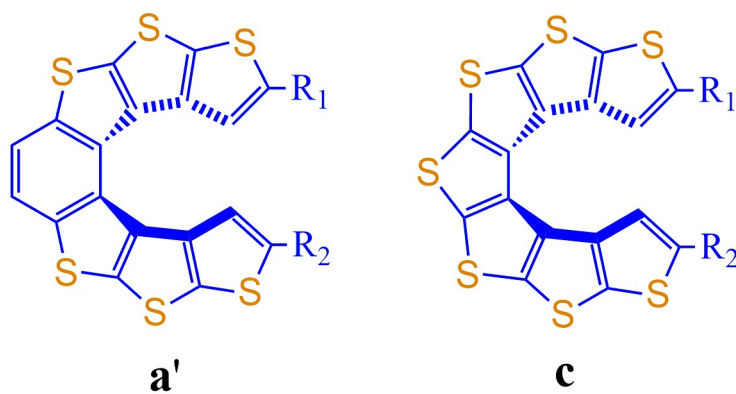

**a'-1**:  $R_1=R_2=\text{Si}(\text{CH}_3)_3$

**a'-3**:  $R_1=R_2=\text{NH}_2$

**a'-4**:  $R_1=R_2=\text{NO}_2$

**a'-7**:  $R_1=\text{NO}_2$ ;  $R_2=\text{NH}_2$

**c**:  $R_1=R_2=\text{Si}(\text{CH}_3)_3$

**Fig. S4** Chemical structures of mono-helicene and its derivatives.
